# Supplementary material
Source: PubMed Central journal article supplement (PMC4789945)
Supplement: linj003076.ww1_default.pdf [file linj003076.ww1_default.pdf]

**Appendix: Codes for identification of disease modifying anti rheumatic drug (DMARD) treatment, cardiovascular pharmacotherapy and morbidities.**

|                                            | Code                                                      |
|--------------------------------------------|-----------------------------------------------------------|
| DMARD treatment (ATC codes)                |                                                           |
| Methotrexate                               | L01BA01, L04AX03                                          |
| Sulfasalazine                              | A07EC01                                                   |
| Azathioprine                               | L04AX01                                                   |
| Hydroxychloroquine                         | P01BA02                                                   |
| Gold therapy                               | M01BC                                                     |
| Leflunomide                                | L04AA13                                                   |
| Cyclosporine                               | L04AA01                                                   |
| Cardiovascular pharmacotherapy (ATC codes) |                                                           |
| Betablocker                                | C07                                                       |
| Lipid lowering                             | C10A                                                      |
| ACEI/ARB                                   | C09                                                       |
| Calcium channel blocker                    | C08                                                       |
| Thiazide diuretic                          | C03A                                                      |
| Loop diuretic                              | C03C                                                      |
| Spirolactone                               | C03D                                                      |
| Vitamin K antagonist                       | B01AA                                                     |
| Platelet inhibitor                         | B01AC                                                     |
| Other covariates (ICD and ATC codes)       |                                                           |
| Diabetes mellitus                          | ATC: A10                                                  |
| Hyperthyroid disease                       | ATC: H03B                                                 |
| Hypertension                               | ATC: C02, C03A, C04, C05, C07, C08, C09                   |
| Heart failure                              | ICD-8: 427.09,427.10, 427.11,427.19,429.00<br>ICD-10: I50 |
| Ischaemic heart disease                    | ICD-8: 411.00 – 414.99<br>ICD-10: I21 - I25               |
| Heart surgery                              | ICD-8 : 300.00 - 313.41<br>KFE – KFN*                     |
| Valvular disease                           | ICD-8: 424<br>ICD-10: I34-I37                             |
| Cardiomyopathy                             | ICD-8: 425<br>ICD-10: I42                                 |
| Chronic obstructive pulmonary disease      | ICD-8: 491,492<br>ICD-10: J42.9, J43, J44                 |

ACEI, Angiotensin-converting enzyme inhibitors; ARB, Angiotensin 2 receptor blockers; ATC, Anatomical Therapeutic Chemical; DMARD, Disease modifying anti rheumatic drug; ICD, International Classification of Diseases

\* Nordic Classification of Surgical Procedures codes
